# Supplementary material for: Highly efficient TiO2-functionalized nylon-6 nanofibrous membranes for rapid adsorptive removal of atrazine from water
Source: Royal Society of Chemistry journal article supplement (doi:10.1039/d6ra02398c), 2026-05-21
Supplement: d6ra02398c1.pdf [file d6ra02398c1.pdf]

## Supporting Data

### Highly Efficient TiO<sub>2</sub>-Functionalized Nylon-6 Nanofibrous Membranes for Rapid Adsorptive Removal of Atrazine from Water

Saira Sidhu<sup>1</sup>, Syeda Sara Hassan<sup>1\*</sup>, Muhammad Rizwan<sup>1</sup>, Zeeshan Khatri<sup>2</sup>, Safina Kamboh

<sup>1</sup>, Akbar Ali<sup>3</sup>, Khalid Hussain Thebo<sup>4\*</sup>, Ahmed Nadeem<sup>5</sup>

<sup>1</sup>*U.S - Pakistan Centre for Advanced Studies in Water, Mehran University of Engineering & Technology, Jamshoro, Pakistan*

<sup>2</sup>*Department of Textile Engineering, Mehran University of Engineering & Technology, Jamshoro, Pakistan*

<sup>3</sup>*MIIT Key Laboratory of Critical Materials Technology for New Energy Conversion and Storage, State Key Laboratory of Urban Water Resource and Environment, School of Chemistry and Chemical Engineering, Harbin Institute of Technology, Harbin 150001, PR China*

<sup>4</sup>*Department of Chemistry, Mirpur University of Science & Technology (MUST), Mirpur, A&J Kashmir, Pakistan*

<sup>5</sup>*Department of Pharmacology and Toxicology, College of Pharmacy, King Saud University, Riyadh 11451, Saudi Arabia*

*Corresponding Authors: [sshassan.uspcasw@faculty.muet.edu.pk](mailto:sshassan.uspcasw@faculty.muet.edu.pk) (S.S.H.)\**

*[khalidthebo@yahoo.com](mailto:khalidthebo@yahoo.com) (K.H.T.)\**

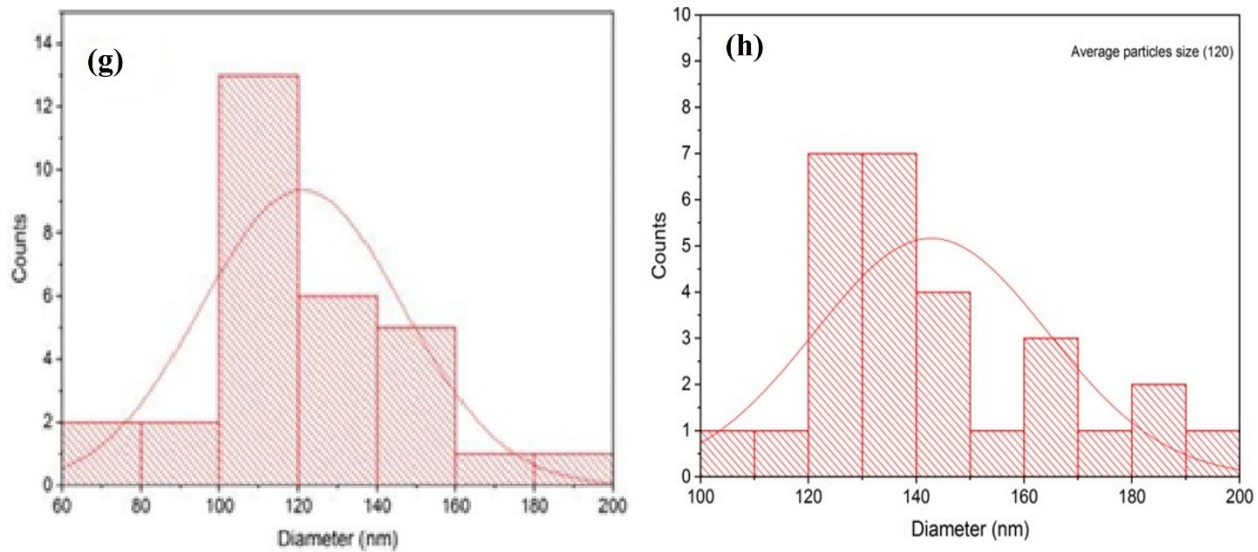

**Fig. S1.** Histogram showing average particle size of TiO<sub>2</sub> nanoparticles and nanofibers.

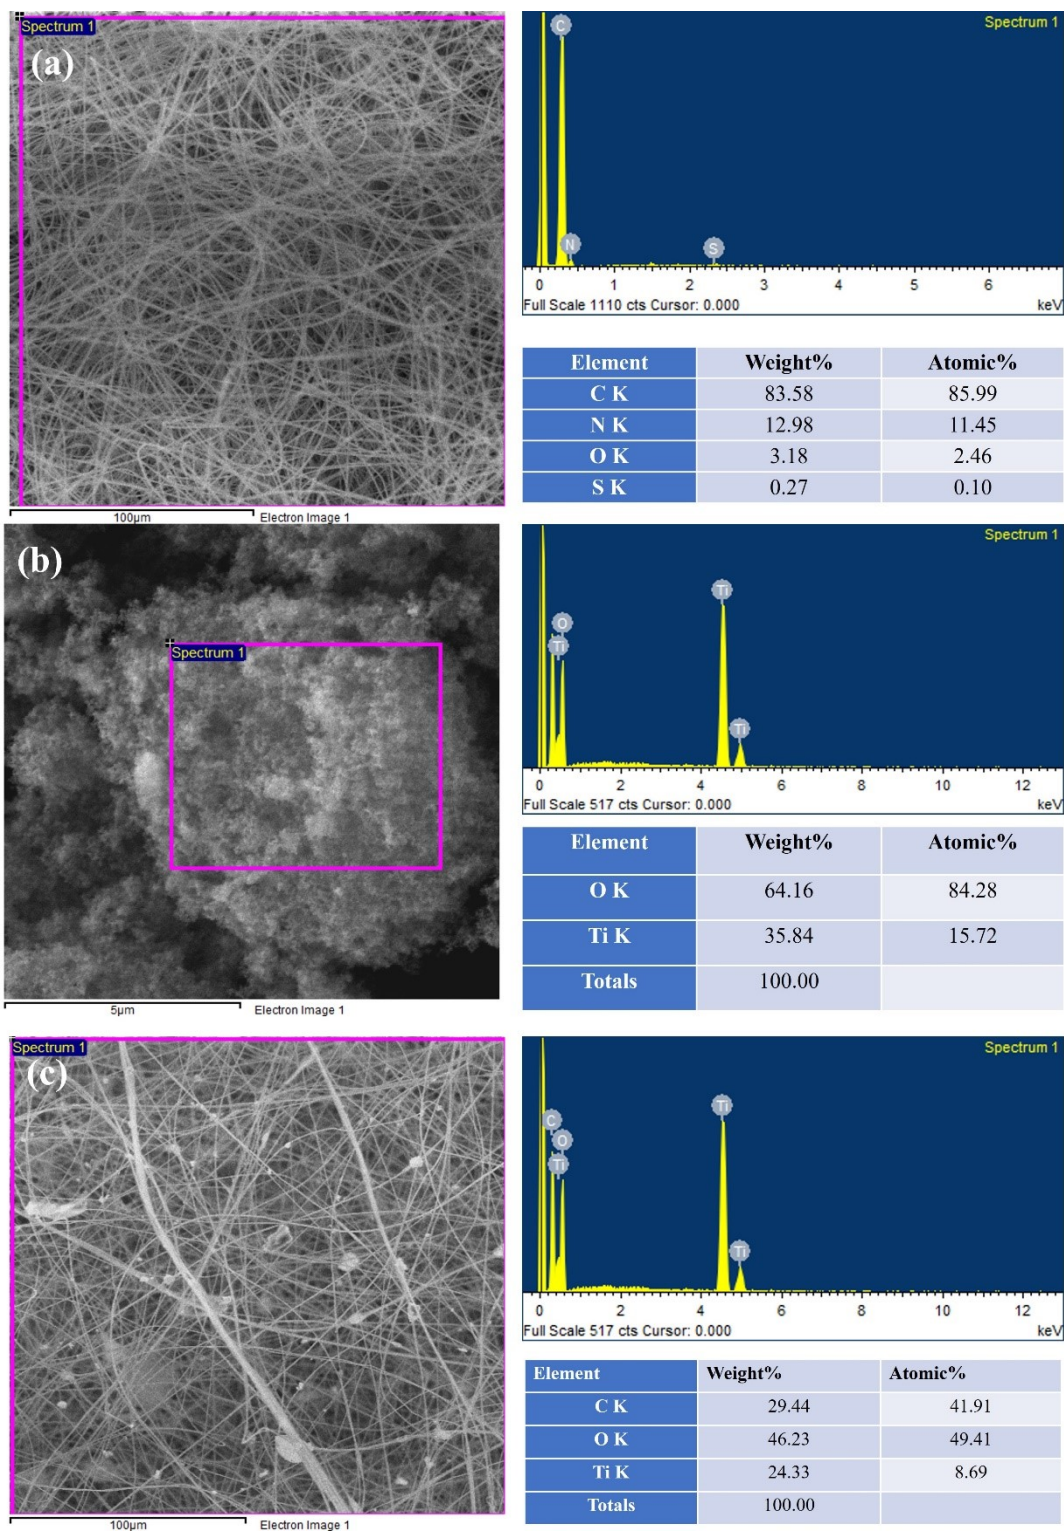

**Fig. S2.** EDS studies of (a) nylon-6, (b) TiO<sub>2</sub> NPs and (c) nylon-6/TiO<sub>2</sub> nanofibrous membranes

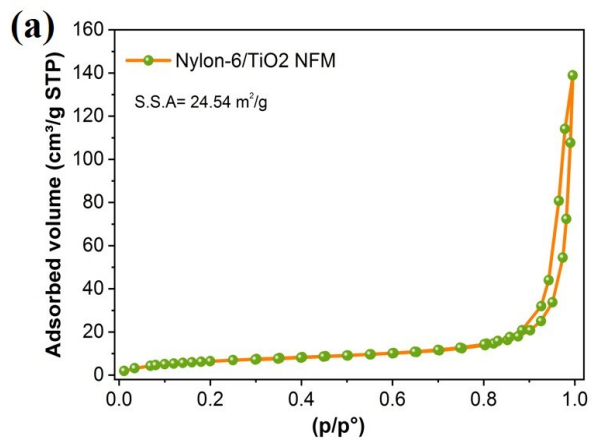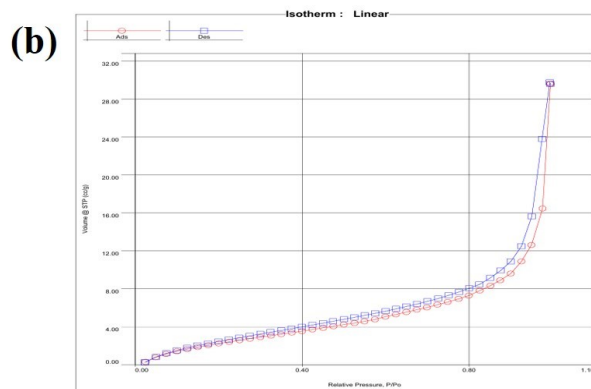

**Fig. S3.** BET surface area of (a) nylon-6/TiO<sub>2</sub> and (b) nylon-6 membranes, respectively.

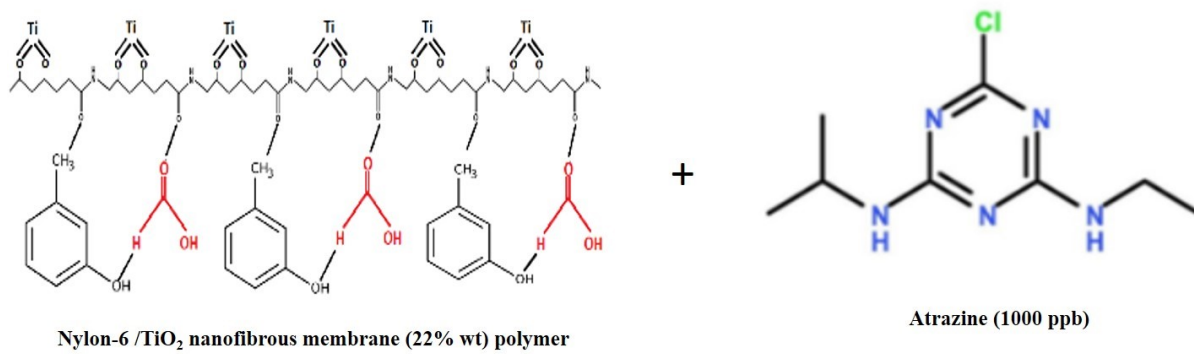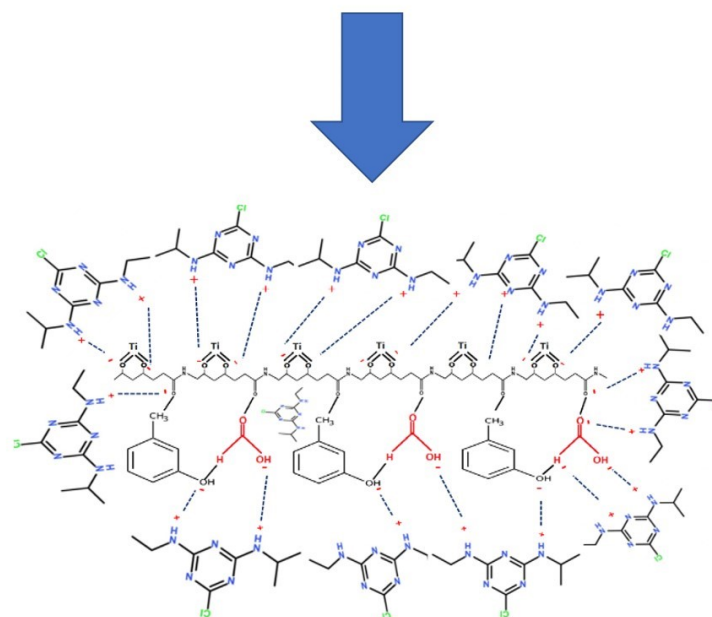

**Fig. S4.** Adsorption mechanism for the pollutant (atrazine) adsorption process by TiO<sub>2</sub>-embedded nylon-6/TiO<sub>2</sub> nanofibrous membranes (22 wt%) polymer-derived nanofiber membrane.

**Table S1.** BET surface area, pore volume, and pore diameter of NFM

| Sample                         | BET Surface Area<br>(m <sup>2</sup> /g) | Pore Volume<br>(cm <sup>3</sup> /g) | Pore Diameter<br>(dv/d) |
|--------------------------------|-----------------------------------------|-------------------------------------|-------------------------|
| <b>Nylon-6</b>                 | 10.124                                  | 0.045                               | 5.042                   |
| <b>Nylon-6/TiO<sub>2</sub></b> | 24.54                                   | 0.037                               | 2.034                   |
